# Supplementary material for: Plant Cells Use Auxin Efflux to Explore Geometry
Source: PubMed Central journal article supplement — Sci Rep. 2014 Jul 28;4:5852. doi: 10.1038/srep05852 (PMC5376164; doi:10.1038/srep05852), 2014-07-28
Supplement: srep05852-s1.pdf [file srep05852-s1.pdf]

## Plant Cells Use Auxin Efflux to Explore Geometry

Beatrice Zaban<sup>1</sup>, Wenwen Liu<sup>2</sup>, Xingyu Jiang<sup>2</sup>, and Peter Nick<sup>1\*</sup>

### Supplementary Information

Control experiment for the incidence of longitudinal (grey bars) and transverse (black bars) cells, as well as protoplasts that have not initiated regeneration (*stage 0*, light grey bars) in the different domains (A-D, see **Figure 3**) without auxin treatment. Data represent mean values and standard errors of five independent biological replicas. Brackets represent statistical significance of the indicated differences as tested by a paired, two-sided t-test (\*  $P < 5\%$ , \*\*  $P < 1\%$ ), the brackets labelled by D represent statistical significance for the *difference* between transverse and longitudinal alignment in a given domain.

**0d**

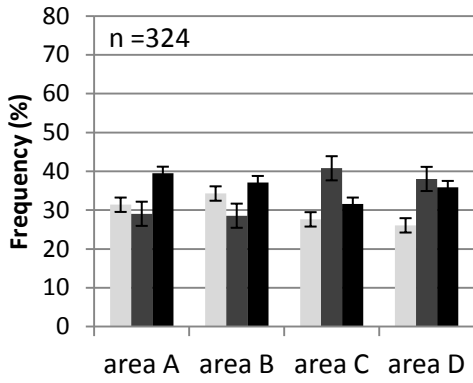

**3d**

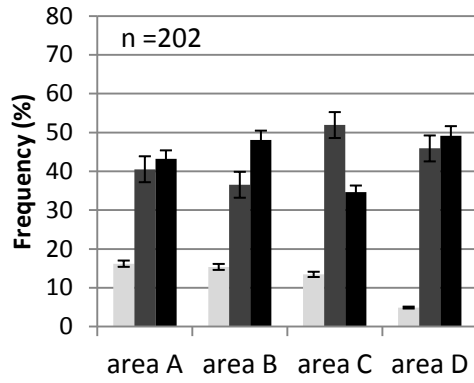

**1d**

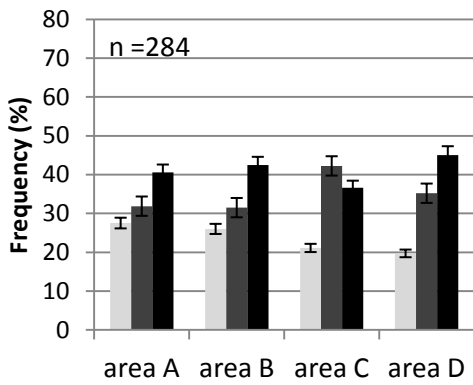

**4d**

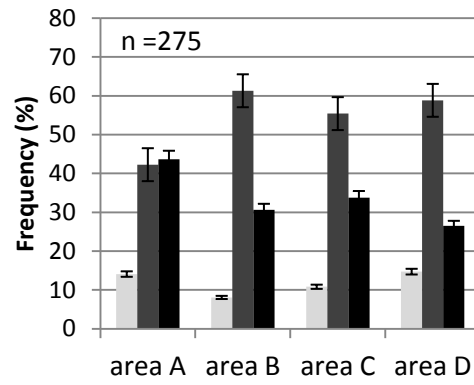

**2d**

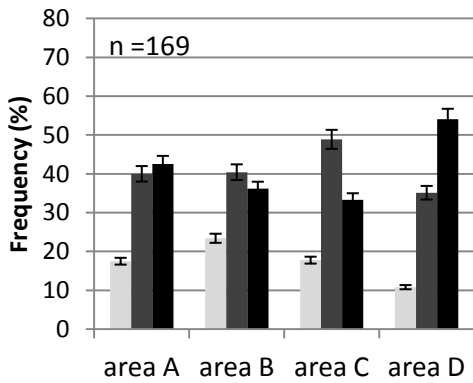

**7d**

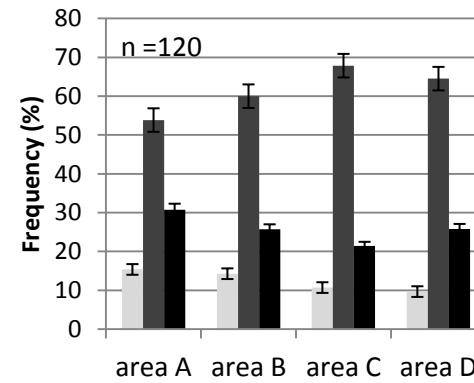

□ stage 0    □ longitudinal    □ transverse
